# Supplementary material for: Half-sandwich cyclopentadienyl ruthenium complexes of achiral and chiral diphosphazanes
Source: Royal Society of Chemistry journal article supplement (doi:10.1039/b205247d), 2002-01-01
Supplement: b205247d.pdf [file b205247d.pdf]

## Supplementary material

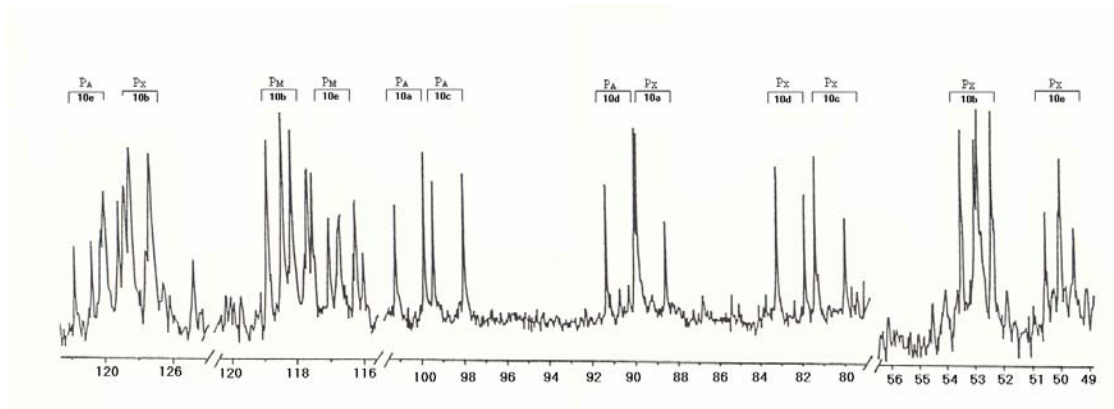

Figure . The  $^{31}\text{P}\{^1\text{H}\}$  NMR (162MHz,  $\text{CDCl}_3$ ) spectrum of the reaction mixture obtained by the reaction of 1 with ( $S_C R_P$ )- and ( $S_C S_P$ )-L<sup>9</sup>
